# Supplementary material for: Transcellular blood–brain barrier disruption in malaria-induced reversible brain edema
Source: Life Sci Alliance. 2022 Mar 8;5(6):e202201402. doi: 10.26508/lsa.202201402 (PMC8905774; doi:10.26508/lsa.202201402)
Supplement: Supplementary file 1 [file LSA-2022-01402_TableS1.xlsx]

## Sheet: Sheet1
	Pediatric CM	Adult CM	Pediatric CM	Adult CM
	non-fatal	non-fatal	fatal	fatal
Microhemorrages present	3/9 (33%)	5/14 (36%)	1/2 (50%)	1/2 (50%)
Microhemorrages absent	6/9 (66%)	9/14 (64%)	1/2 (50%)	1/2 (50%)
